# Supplementary material for: Patients with ulcerative colitis who have normalized histology are clinically stable after de-escalation of therapy
Source: Springer Nature journal article supplement (doi:10.1038/s44355-024-00005-9), 2024-08-02
Supplement: MOESM1 [file 44355_2024_5_MOESM1_ESM.pdf]

Figure S1

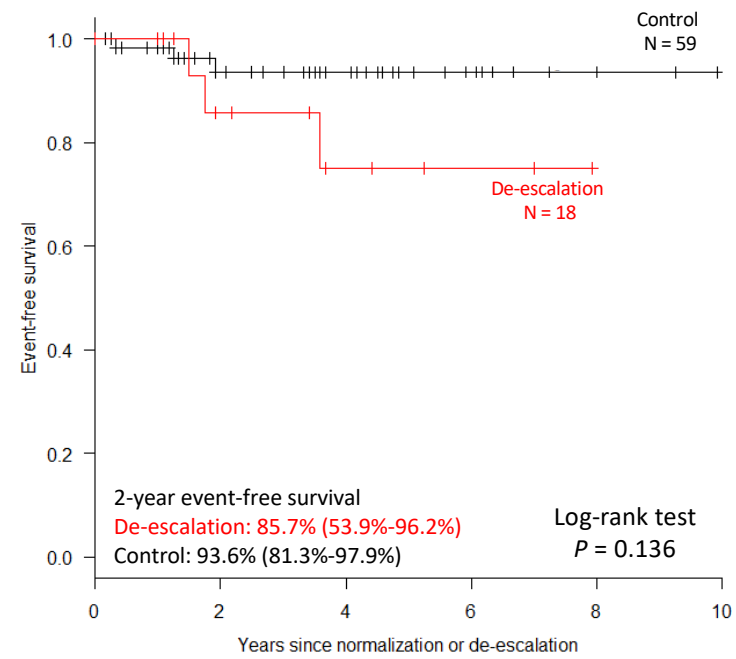

## Supplementary Figure Legend

**Figure S1.** Kaplan-Meier curve of event-free survival for clinical recurrence. This analysis only includes patients who had available baseline Simple Clinical Colitis Activity Index (SCCAI).

**Table S1. Comparative analysis of outcomes between patients with and without therapies immediately after therapeutic withdrawal**

| <b>Outcomes</b>                                                           | <b>No IBD medications<br/>immediately after withdrawal<br/>(N = 10)</b> | <b>IBD medications<br/>immediately after withdrawal<br/>(N = 14)*</b> | <b>P-value</b> |
|---------------------------------------------------------------------------|-------------------------------------------------------------------------|-----------------------------------------------------------------------|----------------|
| <b>Clinical recurrence (%)</b>                                            | 11.1%<br>(1/9)                                                          | 14.3%<br>(2/14)                                                       | 1              |
| <b>Endoscopic recurrence (%)</b>                                          | 28.6%<br>(2/7)                                                          | 27.3%<br>(3/11)                                                       | 1              |
| <b>Histologic recurrence (%)</b>                                          | 28.6%<br>(2/7)                                                          | 36.4%<br>(4/11)                                                       | 1              |
| <b>Start additional therapies or<br/>dose-escalation of therapies (%)</b> | 55.6%<br>(5/9)                                                          | 42.9%<br>(6/14)                                                       | 0.68           |

\*Fourteen patients remained on IBD therapies including 5-ASA (9/14, 64%), immunomodulators (3/14, 21%), and biologics (3/14, 21%).
